# Supplementary material for: Inference and analysis of cell-cell communication using CellChat
Source: PubMed Central journal article supplement (PMC7889871; doi:10.1038/s41467-021-21246-9), 2021-02-17
Supplement: 41467_2021_21246_MOESM3_ESM.pdf [file 41467_2021_21246_MOESM3_ESM.pdf]

## **Description of Additional Supplementary Files**

File Name: Supplementary Data 1

Description: Supplementary excel file lists the inferred ligand-receptor pairs for each method (CellChat, CellPhoneDB, iTALK and SingleCellSignalR) between any two subpopulations from the four spatially colocalized cell populations in E14.5 embryonic mouse skin. The shared ligand-receptor pairs between CellChat and the other three methods are bolded in each result from the three methods.

File Name: Supplementary Data 2

Description: Supplementary excel file shows the average expressions of all predicted ligands and receptors in each cell subpopulation. Related to Figure 3 and Figure 5.
